# Supplementary material for: Pallidal versus Subthalamic Deep-Brain Stimulation for Parkinson's Disease
Source: Atypon-hosted journal article supplement (doi:10.1056/nejmoa0907083), 2010-06-02
Supplement: nejm_follett_2077sa1.pdf [file nejm_follett_2077sa1.pdf]

## Supplementary Appendix

This appendix has been provided by the authors to give readers additional information about their work.

Supplement to: Follett KA, Weaver FM, Stern M, et al. Pallidal versus subthalamic deep-brain stimulation for Parkinson's disease. *N Engl J Med* 2010;362:2077-91.

(PDF updated August 2, 2010.)

The past and present members of the CSP/NINDS 468 Study Group are as follows:

Chairpersons: Kenneth Follett, M.D., Ph.D.; Matthew Stern, M.D.; Frances Weaver, Ph.D.

Chairpersons Office: Dolores Ippolito, M.P.H.; Gatana Stoner, R.N., C.C.R.C.

Hines VA Cooperative Studies Program Coordinating Center: Tammy Barnett, M.A.; Ken Bukowski, B.S.; Rosemarie DeNicolo; Kwan Hur, Ph.D.; Joyce Jimenez; Ping Luo, Ph.D.; Jan Motyka, B.S.; Domenic Reda, Ph.D.; Theresa Simon, R.N., B.S.; Bharat Thakkar, M.S.; Robert Woolson, J.D., M.S.

Pharmacy Coordinating Center: Carol Fye, R.Ph., M.S., C.C.R.P.; William Gagne; Crystal Harris, Pharm.D.

National Institute of Neurological Disorders and Stroke: Jill Heemskerk, Ph.D.; Claudia Moy, Ph.D.; Paul Sheehy, Ph.D.

Department of Veterans Affairs Cooperative Studies Program Central Office, VA Office of Research and Development: Timothy O'Leary, M.D., Ph.D.; Grant D. Huang, M.P.H, Ph.D.

MAVERIC: Louis Fiore, M.D.; Robert Hall, M.S.

Health Economist: Kevin Stroupe, Ph.D.

Executive Committee: Kim Burchiel, M.D.; Kenneth Follett, M.D., Ph.D.; Carol Fye, R.Ph., M.S., C.C.R.P.; Crystal Harris, Pharm.D.; Jill Heemskerk, Ph.D.; Kwan Hur, Ph.D.; William Koller, M.D., Ph.D.; William J. Marks, Jr., M.D.; Claudia Moy, Ph.D.; Rajesh Pahwa, M.D.; Domenic Reda, Ph.D.; Johannes Rothlind, Ph.D.; Oren Sagher, M.D.; Paul Sheehy, Ph.D.; Matthew Stern, M.D.; Frances Weaver, Ph.D.

Data Safety Monitoring Board: Roy Bakay, M.D. (Chairman); Rick Chappell, Ph.D.; Robert Hart, M.D.; Robert Holloway, Jr., M.D., Ph.D.; George McCabe, Ph.D.; Margaret Schenkman, Ph.D.; Jamal Taha, M.D.

Study Monitors: Julia Buckelew, C.C.R.A.; Carol Fye, R.Ph., M.S., C.C.R.P.; Marilyn Garin; Sharon Matzek, C.C.R.A.; Donna Smith, C.C.R.A.

Site Investigators: Jeff Bronstein, M.D., Ph.D.; John Duda, M.D.; Penelope Hogarth, M.D.; Kathryn Holloway, M.D.; Stacy Horn, D.O.; Eugene C. Lai, M.D., Ph.D.; William J. Marks, Jr., M.D.; Ali Samii, M.D.

Site Coordinators: Farah Atassi, M.D., M.P.H.; Cecilia Bello, B.S.N.; Lisette Bunting-Perry, R.N., M.S.N., C.C.R.C.; Tina Conn, B.S.N.; Alice Cugley, R.N., N.P.; Nanette Eubank, R.N., C.C.R.P.; Linda Fincher, R.N., B.S.N.; Romay Franks, B.S.N.; Tammy Harris, M.S.N., R.N., G.N.P.; Mariann Haselman, R.N.; Susan Heath, R.N., M.S.; Miriam Hirsch, M.S., R.N.; Virginia Janovsky, R.N., M.N., M.S.; Elaine Lanier, R.N., M.S.; Mary Lloyd, R.N.; Susan Loehner, B.S.N., M.B.A.; Susan O'Connor, R.N.; Ligaya Ordonez, B.S.N.; Heather Maccarone, R.N., B.S.N.; Kelli Massey-Makhoul, R.N.; Mary Matthews, R.N.; Elizabeth Meyn, B.S.N.; Keiko Mimura, R.N., M.S.N., G.N.P.; Wes Morrow, M.S., M.M.Sc., P.A.C.; Tammy Searles, R.N.; Jamye Valotta, B.S.N.; Usha Vasthare, Ph.D.; Monica Volz, R.N., M.S.; Constance Ward, R.N., M.S.N.; Rebecca Warker, A.P.R.N.; Heidi Watson, B.S.N.; Pamela Willson, Ph.D.

Neurologists: Mark Baron, M.D.; Matthew Brodsky, M.D.; Vincent Calabrese, M.D.; Gordon Campbell, ANP; Amy Colcher, M.D.; Emad Farag, M.D.; Eva Henry, M.D.; Jyh-Gong Hou, M.D., Ph.D.; Gail Kang, M.D.; Galit Kleiner-Fisman, M.D.; Jeff Kraakevik, M.D.; John Nutt, M.D.; Jill Ostrem, M.D.; Aliya Sarwar, M.D.; Indu Subramanian, M.D.; Zeba Vanek, M.D.

Neurosurgeons: Gordon Baltuch, M.D., Ph.D.; Kim Burchiel, M.D.; Antonio De Salles, M.D., Ph.D.; Jorge Eller, M.D.; Kathryn Holloway, M.D.; Paul Larson, M.D.; Richard Simpson, M.D.; Philip Starr, M.D., Ph.D.

Neuropsychologists: William Carne, Ph.D.; Tom Erikson, Ph.D.; Jurg Jaggi, Ph.D.; Jeffrey Kreutzer, Ph.D.; Mario Mendez, M.D., Ph.D.; Paul Moberg, Ph.D.; John Ragland, Ph.D.; Johannes Rothlind, Ph.D.; Ronald Seel, Ph.D.; Elizabeth Soety, Ph.D.; Daniel Storzbach, Ph.D.; Alexander Troster, Ph.D.; Michele York, Ph.D.
